# Supplementary material
Source: publisher figshare collection journal article supplement (https://acs.figshare.com/ndownloader/files/4609822)
Supplement: Supplementary file 1 [file 4609822]

 
data_asa79 
 
_audit_creation_method            SHELXL-97 
_chemical_name_systematic 
; 
 ? 
; 
_chemical_name_common             ? 
_chemical_melting_point           ? 
_chemical_formula_moiety          ? 
_chemical_formula_sum 
 'C23 H36 O3' 
_chemical_formula_weight          360.52 
 
loop_ 
 _atom_type_symbol 
 _atom_type_description 
 _atom_type_scat_dispersion_real 
 _atom_type_scat_dispersion_imag 
 _atom_type_scat_source 
 'C'  'C'   0.0181   0.0091 
 'International Tables Vol C Tables 4.2.6.8 and 6.1.1.4' 
 'H'  'H'   0.0000   0.0000 
 'International Tables Vol C Tables 4.2.6.8 and 6.1.1.4' 
 'O'  'O'   0.0492   0.0322 
 'International Tables Vol C Tables 4.2.6.8 and 6.1.1.4' 
 
_symmetry_cell_setting            ? 
_symmetry_space_group_name_H-M    ? 
 
loop_ 
 _symmetry_equiv_pos_as_xyz 
 'x, y, z' 
 '-x, -y, z' 
 'x+1/2, -y+1/2, -z' 
 '-x+1/2, y+1/2, -z' 
 
_cell_length_a                    16.4914(18) 
_cell_length_b                    19.995(4) 
_cell_length_c                    6.3990(13) 
_cell_angle_alpha                 90.00 
_cell_angle_beta                  90.00 
_cell_angle_gamma                 90.00 
_cell_volume                      2110.0(6) 
_cell_formula_units_Z             4 
_cell_measurement_temperature     193(2) 
_cell_measurement_reflns_used     ? 
_cell_measurement_theta_min       ? 
_cell_measurement_theta_max       ? 
 
_exptl_crystal_description        ? 
_exptl_crystal_colour             ? 
_exptl_crystal_size_max           0.26 
_exptl_crystal_size_mid           0.06 
_exptl_crystal_size_min           0.03 
_exptl_crystal_density_meas       ? 
_exptl_crystal_density_diffrn     1.135 
_exptl_crystal_density_method     'not measured' 
_exptl_crystal_F_000              792 
_exptl_absorpt_coefficient_mu     0.569 
_exptl_absorpt_correction_type    ? 
_exptl_absorpt_correction_T_min   0.8679 
_exptl_absorpt_correction_T_max   0.9820 
_exptl_absorpt_process_details    'Corinc (Dr\"ager, 1971)'           
 
_exptl_special_details 
; 
 ? 
; 
 
_diffrn_ambient_temperature       193(2) 
_diffrn_radiation_wavelength      1.54178 
_diffrn_radiation_type            CuK\a 
_diffrn_source                   'rotating anode'          
_diffrn_radiation_monochromator   graphite 
_diffrn_measurement_device_type   'CAD4 Enraf Nonius'     
_diffrn_measurement_device        '\k-geometry diffractometer'        
_diffrn_measurement_method        \w/2\q
_diffrn_detector_area_resol_mean  ? 
_diffrn_standards_number          ? 
_diffrn_standards_interval_count  ? 
_diffrn_standards_interval_time   ? 
_diffrn_standards_decay_%         ? 
_diffrn_reflns_number             4999 
_diffrn_reflns_av_R_equivalents   0.1246 
_diffrn_reflns_av_sigmaI/netI     0.1574 
_diffrn_reflns_limit_h_min        -19 
_diffrn_reflns_limit_h_max        19 
_diffrn_reflns_limit_k_min        -24 
_diffrn_reflns_limit_k_max        23 
_diffrn_reflns_limit_l_min        -6 
_diffrn_reflns_limit_l_max        7 
_diffrn_reflns_theta_min          3.47 
_diffrn_reflns_theta_max          69.95 
_reflns_number_total              3691 
_reflns_number_gt                 2124 
_reflns_threshold_expression      >2sigma(I) 
 
_computing_data_collection        'Enraf Nonius Software V5'          
_computing_cell_refinement        'Enraf Nonius Software V5'          
_computing_data_reduction         'Corinc (Dr\"ager, 1971)'           
_computing_structure_solution     'SIR-97 (Altomare, 1997)' 
_computing_structure_refinement   'SHELXL-97 (Sheldrick, 1997)'
_computing_molecular_graphics     ? 
_computing_publication_material   ? 
 
_refine_special_details 
; 
 Refinement of F^2^ against ALL reflections.  The weighted R-factor wR and 
 goodness of fit S are based on F^2^, conventional R-factors R are based 
 on F, with F set to zero for negative F^2^. The threshold expression of 
 F^2^ > 2sigma(F^2^) is used only for calculating R-factors(gt) etc. and is 
 not relevant to the choice of reflections for refinement.  R-factors based 
 on F^2^ are statistically about twice as large as those based on F, and R- 
 factors based on ALL data will be even larger. 
; 
 
_refine_ls_structure_factor_coef  Fsqd  
_refine_ls_matrix_type            full 
_refine_ls_weighting_scheme       calc  
_refine_ls_weighting_details 
 'calc w=1/[\s^2^(Fo^2^)+(0.1920P)^2^+0.0000P] where P=(Fo^2^+2Fc^2^)/3' 
_atom_sites_solution_primary      direct 
_atom_sites_solution_secondary    difmap 
_atom_sites_solution_hydrogens    geom 
_refine_ls_hydrogen_treatment     mixed 
_refine_ls_extinction_method      none 
_refine_ls_extinction_coef        ? 
_refine_ls_abs_structure_details 
 'Flack H D (1983), Acta Cryst. A39, 876-881' 
_refine_ls_abs_structure_Flack    -0.1(8) 
_refine_ls_number_reflns          3691 
_refine_ls_number_parameters      241 
_refine_ls_number_restraints      0 
_refine_ls_R_factor_all           0.1797 
_refine_ls_R_factor_gt            0.0978 
_refine_ls_wR_factor_ref          0.3326 
_refine_ls_wR_factor_obs          0.2617 
_refine_ls_goodness_of_fit_ref    1.068 
_refine_ls_restrained_S_all       1.068 
_refine_ls_shift/su_max           0.000 
_refine_ls_shift/su_mean          0.000 
 
loop_ 
 _atom_site_label 
 _atom_site_type_symbol 
 _atom_site_fract_x 
 _atom_site_fract_y 
 _atom_site_fract_z 
 _atom_site_U_iso_or_equiv 
 _atom_site_adp_type 
 _atom_site_occupancy 
 _atom_site_symmetry_multiplicity 
 _atom_site_calc_flag 
 _atom_site_refinement_flags 
 _atom_site_disorder_assembly 
 _atom_site_disorder_group 
C1 C 0.6430(4) 0.2846(4) 1.1289(10) 0.0304(15) Uani 1 1 d . . . 
C2 C 0.7326(4) 0.2782(4) 1.0777(12) 0.0340(16) Uani 1 1 d . . . 
H2A H 0.7643 0.2886 1.2051 0.041 Uiso 1 1 calc R . . 
H2B H 0.7440 0.2312 1.0395 0.041 Uiso 1 1 calc R . . 
C3 C 0.7617(4) 0.3228(4) 0.9031(11) 0.0355(16) Uani 1 1 d . . . 
H3A H 0.7357 0.3096 0.7699 0.043 Uiso 1 1 calc R . . 
H3B H 0.8212 0.3184 0.8866 0.043 Uiso 1 1 calc R . . 
C4 C 0.7395(4) 0.3966(4) 0.9570(11) 0.0326(15) Uani 1 1 d . . . 
H4 H 0.7569 0.4013 1.1061 0.039 Uiso 1 1 calc R . . 
C5 C 0.7936(4) 0.4497(4) 0.8387(10) 0.0390(18) Uani 1 1 d . . . 
C6 C 0.7653(4) 0.5182(4) 0.9127(11) 0.0330(16) Uani 1 1 d . . . 
H6 H 0.7823 0.5228 1.0620 0.040 Uiso 1 1 calc R . . 
C7 C 0.6762(4) 0.5299(3) 0.9049(12) 0.0353(16) Uani 1 1 d . . . 
H7A H 0.6575 0.5273 0.7581 0.042 Uiso 1 1 calc R . . 
H7B H 0.6642 0.5753 0.9576 0.042 Uiso 1 1 calc R . . 
C8 C 0.6301(4) 0.4788(3) 1.0349(13) 0.0362(18) Uani 1 1 d . . . 
H8A H 0.5712 0.4878 1.0227 0.043 Uiso 1 1 calc R . . 
H8B H 0.6453 0.4842 1.1836 0.043 Uiso 1 1 calc R . . 
C9 C 0.6471(4) 0.4057(3) 0.9669(10) 0.0277(14) Uani 1 1 d . . . 
C10 C 0.6138(4) 0.3587(3) 1.1310(11) 0.0318(15) Uani 1 1 d . . . 
H10 H 0.6226 0.3694 1.2910 0.038 Uiso 1 1 d R . . 
C11 C 0.5177(4) 0.3502(4) 1.1140(13) 0.0374(17) Uani 1 1 d . . . 
H11A H 0.4930 0.3432 1.2533 0.045 Uiso 1 1 calc R . . 
H11B H 0.4925 0.3898 1.0473 0.045 Uiso 1 1 calc R . . 
C12 C 0.5087(4) 0.2888(3) 0.9787(11) 0.0291(15) Uani 1 1 d . . . 
C13 C 0.4454(4) 0.2672(4) 0.8636(13) 0.0431(19) Uani 1 1 d . . . 
H13 H 0.3971 0.2930 0.8625 0.052 Uiso 1 1 calc R . . 
C14 C 0.4480(4) 0.2098(4) 0.7487(13) 0.0407(19) Uani 1 1 d . . . 
H14 H 0.4021 0.1965 0.6694 0.049 Uiso 1 1 calc R . . 
C15 C 0.5177(4) 0.1705(4) 0.7472(12) 0.0394(18) Uani 1 1 d . . . 
C16 C 0.5840(4) 0.1922(3) 0.8699(11) 0.0286(15) Uani 1 1 d . . . 
C17 C 0.5806(4) 0.2515(3) 0.9758(10) 0.0279(14) Uani 1 1 d . . . 
C18 C 0.7903(5) 0.4431(4) 0.5997(11) 0.0391(17) Uani 1 1 d . . . 
H18A H 0.7393 0.4622 0.5479 0.059 Uiso 1 1 calc R . . 
H18B H 0.7932 0.3958 0.5609 0.059 Uiso 1 1 calc R . . 
H18C H 0.8361 0.4672 0.5377 0.059 Uiso 1 1 calc R . . 
C19 C 0.8815(4) 0.4418(5) 0.9050(14) 0.048(2) Uani 1 1 d . . . 
H19A H 0.9016 0.3980 0.8597 0.072 Uiso 1 1 calc R . . 
H19B H 0.8854 0.4451 1.0575 0.072 Uiso 1 1 calc R . . 
H19C H 0.9142 0.4771 0.8407 0.072 Uiso 1 1 calc R . . 
O20 O 0.8081(3) 0.5690(2) 0.7953(8) 0.0412(13) Uani 1 1 d . . . 
H20 H 0.7749 0.5956 0.7435 0.049 Uiso 1 1 d R . . 
C21 C 0.6074(4) 0.3963(4) 0.7482(12) 0.0344(16) Uani 1 1 d . . . 
H21A H 0.5495 0.4069 0.7567 0.052 Uiso 1 1 calc R . . 
H21B H 0.6142 0.3498 0.7026 0.052 Uiso 1 1 calc R . . 
H21C H 0.6336 0.4262 0.6474 0.052 Uiso 1 1 calc R . . 
C22 C 0.5234(5) 0.1050(4) 0.6301(14) 0.049(2) Uani 1 1 d . . . 
H22A H 0.5371 0.0690 0.7281 0.073 Uiso 1 1 calc R . . 
H22B H 0.5657 0.1082 0.5229 0.073 Uiso 1 1 calc R . . 
H22C H 0.4712 0.0952 0.5636 0.073 Uiso 1 1 calc R . . 
O23 O 0.6541(3) 0.1529(2) 0.8885(7) 0.0320(11) Uani 1 1 d . . . 
H23 H 0.6496 0.1172 0.8207 0.038 Uiso 1 1 d R . . 
C24 C 0.6287(5) 0.2507(4) 1.3447(11) 0.0390(17) Uani 1 1 d . . . 
H24A H 0.6610 0.2735 1.4515 0.058 Uiso 1 1 calc R . . 
H24B H 0.6451 0.2036 1.3370 0.058 Uiso 1 1 calc R . . 
H24C H 0.5711 0.2534 1.3812 0.058 Uiso 1 1 calc R . . 
O25 O 0.7434(3) 0.1072(3) 0.5849(8) 0.0463(13) Uani 1 1 d . . . 
H25 H 0.7141 0.1221 0.6840 0.069 Uiso 1 1 d R . . 
C26 C 0.8119(6) 0.1488(6) 0.5727(17) 0.068(3) Uani 1 1 d . . . 
H26A H 0.7953 0.1935 0.5264 0.102 Uiso 1 1 calc R . . 
H26B H 0.8506 0.1300 0.4725 0.102 Uiso 1 1 calc R . . 
H26C H 0.8374 0.1520 0.7106 0.102 Uiso 1 1 calc R . . 
 
loop_ 
 _atom_site_aniso_label 
 _atom_site_aniso_U_11 
 _atom_site_aniso_U_22 
 _atom_site_aniso_U_33 
 _atom_site_aniso_U_23 
 _atom_site_aniso_U_13 
 _atom_site_aniso_U_12 
C1 0.029(3) 0.037(4) 0.025(3) 0.005(3) -0.004(3) 0.004(3) 
C2 0.017(3) 0.028(4) 0.057(5) -0.003(3) -0.004(3) 0.001(2) 
C3 0.029(3) 0.046(4) 0.031(4) -0.005(3) -0.006(3) 0.001(3) 
C4 0.029(3) 0.033(4) 0.037(4) -0.007(3) 0.003(3) 0.004(3) 
C5 0.036(4) 0.055(5) 0.026(4) -0.012(3) 0.001(3) -0.006(4) 
C6 0.039(4) 0.033(4) 0.027(4) 0.000(3) -0.005(3) -0.005(3) 
C7 0.041(4) 0.025(3) 0.040(4) -0.006(3) 0.008(3) 0.001(3) 
C8 0.031(4) 0.016(3) 0.062(5) -0.007(3) 0.006(3) 0.009(3) 
C9 0.017(3) 0.031(4) 0.035(4) 0.001(3) -0.002(2) 0.012(3) 
C10 0.034(4) 0.022(3) 0.040(4) -0.012(3) 0.006(3) 0.004(3) 
C11 0.030(4) 0.036(4) 0.046(4) 0.002(3) 0.012(3) -0.006(3) 
C12 0.021(3) 0.022(3) 0.045(4) 0.003(3) 0.006(3) 0.006(3) 
C13 0.026(4) 0.047(5) 0.056(5) 0.012(4) -0.003(4) -0.002(3) 
C14 0.028(4) 0.045(5) 0.050(5) -0.002(3) -0.013(3) -0.005(3) 
C15 0.030(4) 0.046(5) 0.041(5) 0.009(3) -0.001(3) -0.014(3) 
C16 0.028(3) 0.024(3) 0.033(4) 0.008(3) 0.009(3) 0.004(3) 
C17 0.044(4) 0.017(3) 0.023(3) 0.004(2) 0.006(3) -0.006(3) 
C18 0.050(4) 0.040(4) 0.028(4) -0.007(3) 0.008(3) 0.001(4) 
C19 0.015(3) 0.066(6) 0.063(5) 0.012(4) -0.004(3) -0.009(3) 
O20 0.054(3) 0.034(3) 0.035(3) 0.003(2) -0.003(2) -0.019(3) 
C21 0.023(3) 0.035(4) 0.045(4) 0.005(3) -0.003(3) -0.002(3) 
C22 0.043(4) 0.054(5) 0.049(5) -0.016(4) 0.002(4) -0.016(4) 
O23 0.040(3) 0.024(2) 0.032(3) 0.002(2) -0.004(2) 0.005(2) 
C24 0.044(4) 0.035(4) 0.037(4) 0.001(3) 0.000(3) -0.010(3) 
O25 0.035(3) 0.060(3) 0.044(3) 0.000(3) 0.006(2) 0.004(3) 
C26 0.055(6) 0.085(7) 0.064(7) -0.017(5) 0.007(5) 0.004(5) 
 
_geom_special_details 
; 
 All esds (except the esd in the dihedral angle between two l.s. planes) 
 are estimated using the full covariance matrix.  The cell esds are taken 
 into account individually in the estimation of esds in distances, angles 
 and torsion angles; correlations between esds in cell parameters are only 
 used when they are defined by crystal symmetry.  An approximate (isotropic) 
 treatment of cell esds is used for estimating esds involving l.s. planes. 
; 
 
loop_ 
 _geom_bond_atom_site_label_1 
 _geom_bond_atom_site_label_2 
 _geom_bond_distance 
 _geom_bond_site_symmetry_2 
 _geom_bond_publ_flag 
C1 C2 1.519(9) . ? 
C1 C24 1.556(10) . ? 
C1 C10 1.557(9) . ? 
C1 C17 1.567(10) . ? 
C2 C3 1.509(10) . ? 
C3 C4 1.558(10) . ? 
C4 C9 1.536(8) . ? 
C4 C5 1.580(11) . ? 
C5 C19 1.519(10) . ? 
C5 C6 1.522(10) . ? 
C5 C18 1.536(9) . ? 
C6 O20 1.447(8) . ? 
C6 C7 1.488(10) . ? 
C7 C8 1.520(10) . ? 
C8 C9 1.552(9) . ? 
C9 C10 1.512(10) . ? 
C9 C21 1.556(10) . ? 
C10 C11 1.597(9) . ? 
C11 C12 1.510(10) . ? 
C12 C13 1.349(11) . ? 
C12 C17 1.401(9) . ? 
C13 C14 1.364(12) . ? 
C14 C15 1.392(11) . ? 
C15 C16 1.414(10) . ? 
C15 C22 1.513(11) . ? 
C16 C17 1.366(9) . ? 
C16 O23 1.403(8) . ? 
O25 C26 1.406(12) . ? 
 
loop_ 
 _geom_angle_atom_site_label_1 
 _geom_angle_atom_site_label_2 
 _geom_angle_atom_site_label_3 
 _geom_angle 
 _geom_angle_site_symmetry_1 
 _geom_angle_site_symmetry_3 
 _geom_angle_publ_flag 
C2 C1 C24 107.6(6) . . ? 
C2 C1 C10 112.5(6) . . ? 
C24 C1 C10 111.1(6) . . ? 
C2 C1 C17 117.9(6) . . ? 
C24 C1 C17 105.7(5) . . ? 
C10 C1 C17 101.8(5) . . ? 
C3 C2 C1 114.9(6) . . ? 
C2 C3 C4 108.7(6) . . ? 
C9 C4 C3 110.7(6) . . ? 
C9 C4 C5 120.0(6) . . ? 
C3 C4 C5 113.4(6) . . ? 
C19 C5 C6 107.5(6) . . ? 
C19 C5 C18 107.6(6) . . ? 
C6 C5 C18 112.1(6) . . ? 
C19 C5 C4 109.5(6) . . ? 
C6 C5 C4 106.5(6) . . ? 
C18 C5 C4 113.5(6) . . ? 
O20 C6 C7 110.8(6) . . ? 
O20 C6 C5 108.6(6) . . ? 
C7 C6 C5 115.7(6) . . ? 
C6 C7 C8 111.8(6) . . ? 
C7 C8 C9 112.9(6) . . ? 
C10 C9 C4 108.4(5) . . ? 
C10 C9 C8 109.0(5) . . ? 
C4 C9 C8 107.6(5) . . ? 
C10 C9 C21 113.4(6) . . ? 
C4 C9 C21 111.5(5) . . ? 
C8 C9 C21 106.8(6) . . ? 
C9 C10 C1 118.2(5) . . ? 
C9 C10 C11 112.3(6) . . ? 
C1 C10 C11 101.8(5) . . ? 
C12 C11 C10 102.9(5) . . ? 
C13 C12 C17 118.5(7) . . ? 
C13 C12 C11 130.5(6) . . ? 
C17 C12 C11 110.9(6) . . ? 
C12 C13 C14 122.7(7) . . ? 
C13 C14 C15 120.3(7) . . ? 
C14 C15 C16 117.5(7) . . ? 
C14 C15 C22 122.9(7) . . ? 
C16 C15 C22 119.5(7) . . ? 
C17 C16 O23 118.5(6) . . ? 
C17 C16 C15 120.7(6) . . ? 
O23 C16 C15 120.8(6) . . ? 
C16 C17 C12 120.2(6) . . ? 
C16 C17 C1 130.6(6) . . ? 
C12 C17 C1 108.8(6) . . ? 
 
loop_ 
 _geom_torsion_atom_site_label_1 
 _geom_torsion_atom_site_label_2 
 _geom_torsion_atom_site_label_3 
 _geom_torsion_atom_site_label_4 
 _geom_torsion 
 _geom_torsion_site_symmetry_1 
 _geom_torsion_site_symmetry_2 
 _geom_torsion_site_symmetry_3 
 _geom_torsion_site_symmetry_4 
 _geom_torsion_publ_flag 
C24 C1 C2 C3 -165.2(6) . . . . ? 
C10 C1 C2 C3 -42.5(8) . . . . ? 
C17 C1 C2 C3 75.5(8) . . . . ? 
C1 C2 C3 C4 55.2(8) . . . . ? 
C2 C3 C4 C9 -63.9(7) . . . . ? 
C2 C3 C4 C5 157.9(6) . . . . ? 
C9 C4 C5 C19 163.1(7) . . . . ? 
C3 C4 C5 C19 -62.9(8) . . . . ? 
C9 C4 C5 C6 47.2(8) . . . . ? 
C3 C4 C5 C6 -178.8(6) . . . . ? 
C9 C4 C5 C18 -76.6(8) . . . . ? 
C3 C4 C5 C18 57.5(8) . . . . ? 
C19 C5 C6 O20 67.6(7) . . . . ? 
C18 C5 C6 O20 -50.4(8) . . . . ? 
C4 C5 C6 O20 -175.1(6) . . . . ? 
C19 C5 C6 C7 -167.0(6) . . . . ? 
C18 C5 C6 C7 74.9(8) . . . . ? 
C4 C5 C6 C7 -49.8(8) . . . . ? 
O20 C6 C7 C8 -177.6(5) . . . . ? 
C5 C6 C7 C8 58.2(9) . . . . ? 
C6 C7 C8 C9 -57.4(8) . . . . ? 
C3 C4 C9 C10 58.8(7) . . . . ? 
C5 C4 C9 C10 -166.1(6) . . . . ? 
C3 C4 C9 C8 176.5(6) . . . . ? 
C5 C4 C9 C8 -48.4(8) . . . . ? 
C3 C4 C9 C21 -66.7(8) . . . . ? 
C5 C4 C9 C21 68.4(8) . . . . ? 
C7 C8 C9 C10 168.0(6) . . . . ? 
C7 C8 C9 C4 50.6(8) . . . . ? 
C7 C8 C9 C21 -69.2(7) . . . . ? 
C4 C9 C10 C1 -47.2(8) . . . . ? 
C8 C9 C10 C1 -164.0(6) . . . . ? 
C21 C9 C10 C1 77.2(7) . . . . ? 
C4 C9 C10 C11 -165.3(6) . . . . ? 
C8 C9 C10 C11 77.9(7) . . . . ? 
C21 C9 C10 C11 -40.9(7) . . . . ? 
C2 C1 C10 C9 39.1(8) . . . . ? 
C24 C1 C10 C9 159.8(6) . . . . ? 
C17 C1 C10 C9 -88.0(7) . . . . ? 
C2 C1 C10 C11 162.6(6) . . . . ? 
C24 C1 C10 C11 -76.7(7) . . . . ? 
C17 C1 C10 C11 35.5(6) . . . . ? 
C9 C10 C11 C12 93.7(6) . . . . ? 
C1 C10 C11 C12 -33.7(7) . . . . ? 
C10 C11 C12 C13 -159.5(8) . . . . ? 
C10 C11 C12 C17 18.8(7) . . . . ? 
C17 C12 C13 C14 1.6(12) . . . . ? 
C11 C12 C13 C14 179.8(7) . . . . ? 
C12 C13 C14 C15 0.2(12) . . . . ? 
C13 C14 C15 C16 0.7(11) . . . . ? 
C13 C14 C15 C22 177.5(8) . . . . ? 
C14 C15 C16 C17 -3.6(10) . . . . ? 
C22 C15 C16 C17 179.5(6) . . . . ? 
C14 C15 C16 O23 175.3(6) . . . . ? 
C22 C15 C16 O23 -1.6(10) . . . . ? 
O23 C16 C17 C12 -173.4(6) . . . . ? 
C15 C16 C17 C12 5.6(9) . . . . ? 
O23 C16 C17 C1 -2.4(10) . . . . ? 
C15 C16 C17 C1 176.6(6) . . . . ? 
C13 C12 C17 C16 -4.5(10) . . . . ? 
C11 C12 C17 C16 177.0(6) . . . . ? 
C13 C12 C17 C1 -177.3(6) . . . . ? 
C11 C12 C17 C1 4.2(7) . . . . ? 
C2 C1 C17 C16 38.8(10) . . . . ? 
C24 C1 C17 C16 -81.4(8) . . . . ? 
C10 C1 C17 C16 162.3(6) . . . . ? 
C2 C1 C17 C12 -149.4(6) . . . . ? 
C24 C1 C17 C12 90.3(6) . . . . ? 
C10 C1 C17 C12 -25.9(7) . . . . ? 
 
loop_ 
 _geom_hbond_atom_site_label_D 
 _geom_hbond_atom_site_label_H 
 _geom_hbond_atom_site_label_A 
 _geom_hbond_distance_DH 
 _geom_hbond_distance_HA 
 _geom_hbond_distance_DA 
 _geom_hbond_angle_DHA 
 _geom_hbond_site_symmetry_A 
O20 H20 O25  0.83 2.14 2.688(8) 123.6 4_656 
O23 H23 O25  0.84 2.17 2.603(7) 112.1 . 
O25 H25 O23  0.85 1.75 2.603(7) 179.8 . 
 
_diffrn_measured_fraction_theta_max    0.956 
_diffrn_reflns_theta_full              69.95 
_diffrn_measured_fraction_theta_full   0.956 
_refine_diff_density_max    0.442 
_refine_diff_density_min   -0.401 
_refine_diff_density_rms    0.107 
